1 **Off-Label Dosing of Direct Oral Anticoagulants Among Inpatients with Atrial Fibrillation**

2  
3 Amneet Sandhu, MD, MSc<sup>1,2</sup>; Lisa A. Kaltenbach, MS<sup>4</sup>; Karen Chiswell, PhD<sup>4</sup>; Vijay Shimoga, BS<sup>6</sup>;  
4 Carmel Ashur, MD<sup>2</sup>; Abby Pribish, MD<sup>2</sup>; Gregg C. Fonarow, MD<sup>5</sup>; Jonathan P. Piccini Sr, MD<sup>3,4</sup>; P.  
5 Michael Ho, MD, PhD<sup>1,2</sup>; Paul D. Varosy, MD<sup>1,2</sup>; Paul L. Hess, MD, MHS<sup>1,2</sup>

6  
7 1 Denver VA Medical Center, Section of Cardiology

8 2 University of Colorado, Division of Cardiology

9 3 Duke University Hospital

10 4 Duke Clinical Research Institute

11 5 University of California Los Angeles, Division of Cardiology

12 6 University of Colorado, School of Medicine

13  
14 Key Words: anticoagulation, atrial fibrillation, off-label, underdosing, overdosing

15  
16 Word Count (total manuscript excluding title page): 4121

17  
18 Address for Correspondence:

19 Amneet Sandhu, MD, MSc

20 F2-171

21 1700 N Wheeling St

22 Aurora, CO 80045

23 Phone: 720-723-8461

24 Fax: 720-723-7839

25 Email: [amneet.sandhu@cuanschutz.edu](mailto:amneet.sandhu@cuanschutz.edu)

26  
27 Sources of Funding:

28 The Get With The Guidelines<sup>®</sup>-AFIB (GWTG-AFIB) program is provided by the American Heart  
29 Association. GWTG-AFIB is sponsored, in part, by BMS Pfizer, Tylenol and Philips Image Guided  
30 Therapy.

31  
32  
33  
34  
35  
36  
37  
38  
39  
40  
41  
42  
43  
44

45 **ABSTRACT**

46 **Introduction:**

47 Among patients hospitalized for atrial fibrillation (AF), the frequency of off-label direct oral  
48 anticoagulant (DOAC) dosing, associated factors, hospital-level variation, and temporal trends  
49 in contemporary clinical practice are unknown.

50

51 **Methods:**

52 Using the Get With The Guidelines® Atrial Fibrillation (GWTG-AF) registry, patients admitted  
53 from January 1<sup>st</sup>, 2014 to March 31<sup>st</sup>, 2020, and discharged on DOAC therapy were stratified  
54 according to receipt of underdosing, overdosing, or recommended dosing. Factors associated  
55 with off-label dosing were identified using logistic regression. Hospital-level variation and  
56 temporal trends were assessed.

57

58 **Results:**

59 Of 22,470 patients prescribed a DOAC at discharge from hospitalization for AF (66% apixaban,  
60 29% rivaroxaban, 5% dabigatran), underdosing occurred among 2006 (8.9%), overdosing among  
61 511 (2.3%), and recommended dosing among 19953 (88.8%). Patient-related factors associated  
62 with off-label DOAC use included age (underdosing: OR 1.06 per 1-year increase [95% CI 1.06-  
63 1.07] and overdosing: OR 1.07 per 1-year increase [1.06-1.09]), dialysis dependence  
64 (underdosing: OR 5.50 [3.76-8.05] and overdosing: OR 5.47 [2.74-10.88]), female sex  
65 (overdosing: OR 0.79 [0.63-0.99]) and weight (overdosing: OR 0.96 per 1-Kg increase [0.95-  
66 1.00]). Across hospitals, the adjusted median odds ratio for off-label DOAC use was 1.45 [95%  
67 CI 1.34-1.65] (underdosing: 1.52 [1.39-1.76] and overdosing: 1.32 [1.20-1.84]), indicating  
68 significant hospital-level variation. Hospital characteristics associated with underdosing  
69 included West vs. Northeast location (OR: 1.55 [1.04-2.31]), rural vs. urban setting (OR: 0.48  
70 [0.28-0.83]), and number of beds (<200 vs. 500+, OR: 1.95 [1.29-2.95]). Recommended dosing  
71 significantly increased over time (81.9% in 2014 to 90.9% in 2020,  $p < 0.0001$  for trend) with a  
72 corresponding decline in underdosing (14.4% in 2014 to 6.6% in 2020,  $p < 0.0001$  for trend) and  
73 overdosing (3.8% in 2014 to 2.5% in 2020,  $p = 0.001$  for trend).

74

75 **Conclusion:**

76 One of 10 patients hospitalized for atrial fibrillation is discharged on off-label dosing of DOAC  
77 with significant variation across hospitals. While the proportion of patients receiving  
78 recommended dosing has significantly improved over time, opportunities to improve DOAC  
79 dosing persist.

80

81

82

83

84

85

86

87

88

89 **INTRODUCTION**

90 Appropriately dosed direct oral anticoagulants (DOACs) reduce the risk of stroke and  
91 systemic embolism among select patients with atrial fibrillation (AF).<sup>1-3</sup> The Food and Drug  
92 Administration (FDA) specified dosing derived from pivotal phase III trials<sup>1-3</sup> based on factors  
93 inclusive of age, weight, kidney function, and concomitant medication use. Unfortunately, use  
94 of DOACs at doses not studied in the pivotal trials or recommended in FDA-labeling has been  
95 significant, affecting up to 12-20% of patients.<sup>4-7</sup> Off-label DOAC dosing for AF has been  
96 observed in the outpatient setting and is associated with increased risk of cardiovascular  
97 hospitalization and all-cause mortality.<sup>5,6</sup> Meta-analyses have also shown an increased bleeding  
98 risk with DOAC overdosing and higher stroke risk with DOAC underdosing.<sup>8</sup>

99 The degree to which off-label DOAC dosing occurs in patients hospitalized for AF is  
100 unknown. Hospitalizations often are associated with significant changes in health critical to  
101 prescription of an optimal DOAC dose, including weight, kidney function, and concurrent  
102 medication use. Temporal trends in off-label DOAC use and how use of these agents varies  
103 between hospitals is not known. Accordingly, using data from the Get With The Guidelines®-  
104 Atrial Fibrillation (GWTG-AFIB) registry, we sought to characterize (1) off-label DOAC dosing  
105 rates at discharge among patients requiring hospitalization for AF, (2) patient- and facility-level  
106 factors associated with off-label DOAC dosing and (3) temporal changes in the proportion of  
107 patients treated with off-label DOAC dosing.

108

109 **METHODS**

110 Data Source

111 The data used were collected by the American Heart Association’s Get With The  
112 Guidelines®-AFib registry. GWTG-AFIB registry was launched in 2013 as a prospective, national,  
113 observational initiative tracking hospital encounters for atrial fibrillation. The program and data  
114 elements of the GWTG-AFIB registry have been previously described.<sup>9</sup> IQVIA (Parsippany, New  
115 Jersey) serves as the data collection and coordination center. A key objective of the GWTG  
116 program is to highlight national and institutional-level opportunities for quality improvement.  
117 Each participating hospital received either human research approval to enroll cases without  
118 individual patient consent under the common rule, or a waiver of authorization and exemption  
119 from subsequent review by their institutional review board. The Duke Clinical Research Institute  
120 (Durham, NC) serves as the data analysis center and has an agreement to analyze the aggregate  
121 deidentified data for research purposes. The Institutional Review Board at Duke University  
122 Health approved this study. Participating sites were required to adhere to local regulatory and  
123 privacy procedures and obtain Institutional Review Board approval if needed. Institutional  
124 review board approval was granted to analyze limited data for research purposes.

125

126 Study Population

127 The study population included patients who required hospital care for management of  
128 atrial fibrillation or atrial flutter and were discharged on a DOAC (apixaban, rivaroxaban or  
129 dabigatran between January 1<sup>st</sup>, 2014 and March 31<sup>st</sup>, 2020). Patient records that were (1)  
130 missing key demographic variables or medical history including age, sex, weight or history of  
131 atrial fibrillation, (2) missing discharge anticoagulant, dose, or frequency, (3) missing serum  
132 creatinine data at the time of discharge, (4) contraindications to DOAC or anticoagulant use or

133 (5) document special circumstances (transition to comfort care or discharged against medical  
134 advice) or had missing destination after discharge were excluded (**Supplemental Figure 1**).

135

### 136 Study Definition

137 The designation of “off-label” was defined as deviation from dosing specified by FDA  
138 package inserts and used in the seminal DOAC trials.<sup>1-3</sup> They are based on age, weight, kidney  
139 function at discharge, and comorbid conditions such as need for dialysis (**Supplemental Table**  
140 **1**).<sup>10-12</sup> Recommended dosing of dabigatran varies by creatinine clearance (CrCl >30 ml/min =  
141 150mg orally twice daily and CrCl 15-30 ml/min = 75 mg orally twice daily). For apixaban,  
142 recommended dosing is 5 mg twice daily. In the presence of any 2 of 3 factors comprised of  
143 age ≥80 years, weight ≤60 kg and a serum creatinine of ≥1.5 mg/dL, recommended dosing is  
144 2.5mg orally twice daily. Recommended rivaroxaban dosing varies by creatinine clearance (>50  
145 ml/min = 20mg orally once daily, 15-50 ml/min = 15mg orally once daily, and <15 ml/min = not  
146 recommended).

147

### 148 Statistical Analysis

149 Patient characteristics were stratified by discharge DOAC dose characterized as  
150 underdosing, recommended dosing, or overdosing. Categorical variables were recorded as  
151 counts (percentages) and continuous variables reported as a median (Q1, Q3). Assessments of  
152 between-group differences were performed using Pearson  $\chi^2$  or Fisher’s exact test as  
153 appropriate for the former and Kruskal-Wallis tests for the latter. In sensitivity analyses, rates  
154 of off-label dosing were assessed among patients with newly diagnosed AF, those were  
155 admitted on DOAC and discharged with a different prescription, and according to weight (≤ 60  
156 kg, 60-120 kg, ≥120 kg or body mass index >40 Kg/m<sup>2</sup>).

157 To assess patient- and hospital-level factors associated with off-label dosing, overdosing  
158 was compared with recommended dosing and underdosing was compared with recommended  
159 dosing. In each case, a logistic regression model with stepwise selection was fitted using a  
160 significance of 0.10 to enter and remain in the model. Candidate variables were selected based  
161 on prior literature<sup>5,6</sup> and clinical judgment which included demographics (age, sex, race and  
162 ethnicity), conditions affecting prior health (such as coronary artery disease, prior stroke or TIA,  
163 diabetes, hypertension, COPD, OSA, prior myocardial infarction, prior PCI, thyroid disease, prior  
164 hemorrhage, PVD, dialysis, liver disease, heart failure), other patient characteristics (such as left  
165 ventricular ejection fraction and history of other arrhythmias, smoking, insurance status), and  
166 hospital characteristics (region, academic, bedsize, rural). After variable selection, a random  
167 intercept for hospital to account for within hospital clustering was added. We assessed whether  
168 patient- or hospital-level factors play a larger role in inappropriate dosing using reference effect  
169 measures<sup>13</sup>, which compare patients in clusters at specified percentiles of the random effect of  
170 the distribution to patients with the same values for all measured covariates in a reference  
171 cluster. To make comparisons of site variability, variables were scaled such that odds ratios are  
172 comparable across variables. Whereas binary variables were dichotomized as in their original  
173 form, continuous variables were divided by 2\*standard deviation (SD).

174 To characterize variation across hospitals, the percentage of patients with off-label  
175 dosing out of the total number of patients eligible for DOAC dosing was calculated for each  
176 hospital. Hospitals with <30 admissions in the study population were excluded. Hospital-level

177 variation use was then graphically displayed using a caterpillar plot. To account for variation in  
178 the number of patients per site, a hierarchical logistic regression model with random intercepts  
179 for site was fitted. The model was then used to test whether variance components for site  
180 were greater than zero and to calculate the median odds ratio (MOR) between sites. The MOR  
181 can be interpreted as the median increase in odds of off-label dosing when an individual moves  
182 from a lower to a higher-risk hospital. It provides an estimate of the effect size of the hospital  
183 variation on the outcome of off-label DOAC dosing. A MOR >1.2 represents significant clinical  
184 variation.<sup>14</sup>

185 To describe temporal trends in percentage off-label DOAC dosing, the percentage of  
186 patients with off-label dosing was calculated by calendar quarter beginning in 2014. Trends in  
187 percentage of recommended dosing, underdosing, and overdosing over time was graphically  
188 displayed. To assess temporal trend significance, unadjusted and adjusted logistic regression  
189 models with random intercepts for site were fitted for overdosing versus recommended dosing  
190 and underdosing versus recommended dosing. The final clinical variables of the models  
191 described as well as random intercepts for site and time in quarters were included. The effect  
192 of quarterly trends of off-label DOAC dosing was estimated using odds ratios (95% confidence  
193 intervals).

194

## 195 RESULTS

196 Among 22,470 patients discharged after a hospital encounter for AF, 2006 (8.9%)  
197 received a DOAC that was lower than the recommended dose, 19953 (88.8%) received a DOAC  
198 at recommended dosing, and 511 (2.3%) received a DOAC that was higher than the  
199 recommended dose. **Figure 1** displays underdosing, overdosing, and recommended dosing by  
200 DOAC type and overall.

201 **Table 1** displays patient-level data for the overall cohort and stratified by underdosed,  
202 recommended dosing and overdosed. In the overall population, the mean age was 70.1 +/- 12.1  
203 years old, 48.1% were female, and the mean body mass index was 31.2 +/- 7.9 Kg/m<sup>2</sup>. The  
204 mean CHADS2Vasc score was 3.76 +/- 1.75, 42.0% had paroxysmal AF and 37.6% had chronic  
205 kidney disease resulting in an eGFR <60 ml/min while 0.7% were on hemodialysis. Relative to  
206 those discharged on DOAC dosing consistent with FDA labeling, patients who received  
207 underdosed DOACs were older (77.0 +/- 11.2 years vs. 69.1 +/- 11.9), more commonly on  
208 dialysis (2.7% vs. 0.5%), more frequently had a prior hemorrhage (4.7% vs. 2.6%), and more  
209 frequently received care at hospitals located in non-rural settings (4.8% vs. 4.4%) or with less  
210 than 500 beds (43.4% vs. 33.8%). Relative to FDA-labeled use of DOACs on discharge, those  
211 who received overdosed DOACs were older (80.6 +/- 7.8 years vs 69.1 +/- 11.9), more  
212 frequently women (66.3% vs. 46.6%), usually had a lower body mass index (25.1 +/- 5.8 vs. 31.5  
213 +/- 5.8), and more frequently were on dialysis (2.4% vs. 0.5%). In sensitivity analyses of rates of  
214 lower than recommended dose, recommended, and higher than recommended dose by new AF  
215 diagnosis, change in DOAC type (ie. from apixaban to rivaroxaban) during hospitalization or  
216 patient weight, findings were comparable to the primary analysis.

217 **Figures 2** displays factors associated with overdosing and underdosing relative to  
218 recommended dosing as well as measures of variation across hospitals. In multivariable  
219 modeling, higher rates of underdosing were associated with patient-level factors such as older  
220 age, dialysis dependence, and prior hemorrhage and hospital-level factors such as Western and

221 urban location as well as servicing relatively few beds. Across hospitals, the reference effect  
222 measure for random site variation of receipt of underdosed DOAC at discharge (90<sup>th</sup> percentile  
223 in comparison to median hospital) was OR 1.75 (95% CI 1.54-2.00). Higher rates of overdosing  
224 were associated with patient-level factors such as older age and dialysis dependence. Hospital-  
225 level factors were not significantly contributory. Across hospitals, the reference effect measure  
226 for random site variation of receipt of an overdosed DOAC at discharge (90<sup>th</sup> percentile in  
227 comparison to median hospital) was OR 1.46 (95% CI 1.29-1.65).

228 Across participating sites, the median observed percent of off-label DOAC use was  
229 10.9% (IQR 6.8 – 15.9%). **Figure 3** displays hospital-level variation in the rate of off-label DOAC  
230 use in addition to hospital-level variation in rates of underdosing and overdosing. The overall  
231 adjusted MOR for off-label DOAC use across hospitals was 1.45 (95% CI 1.34-1.65) [REM or  
232 random effects model range 0.47-2.14], indicating significant variation across sites. The  
233 adjusted MOR for underdosing was 1.52 (95% CI 1.39-1.76) [REM range 0.42-2.36] and  
234 overdosing 1.32 (1.20-1.84) [REM range 0.56-1.78]. **Table 2** shows that in random effects  
235 models, while patient factors contributed more to variability than facility-level factors, facility-  
236 level factors were nonetheless significantly contributory to both underdosing and overdosing.  
237 **Figure 4** shows temporal trends in the rates of recommended dosing, underdosing, and  
238 overdosing of DOACs. There was a significant increase in recommended dosing from 81.9% in  
239 2014 to 90.9% in 2020,  $p < 0.0001$  for trend. There was a significant decline in those receiving  
240 underdosing (14.4% in 2014 to 6.6% in 2020,  $p < 0.0001$  for trend) and overdosing (3.8% in 2014  
241 to 2.5% in 2020,  $p = 0.001$  for trend) dosing over the study period.

## 242 243 **DISCUSSION**

244 In this nationwide analysis of more than 22,000 patients hospitalized for care of atrial  
245 fibrillation and discharged on DOACs, there are three key findings. First, 1 of 10 patients  
246 hospitalized for AF receive under or overdosed DOACs. Second, significant hospital-level  
247 variation exists with regards to use of off-label DOAC dose, with the greatest opportunity for  
248 future improvement in hospitals that are Western, urban, or of comparatively small size. Third,  
249 over the study period, rates of recommended DOAC dosing increased and off-label use  
250 decreased. These results characterize favorable national trends in DOAC use while identifying  
251 continued opportunities to improve safe and appropriate DOAC dosing at hospital discharge.

252 Prior work has analyzed rates of off-label DOAC dose in ambulatory outpatients (9.4%  
253 are underdosed, 3.4% overdosed and 87% per recommendation) correlating adverse  
254 cardiovascular or bleeding events in those who received off-label dosing.<sup>6</sup> Our work extends  
255 that of prior analyses by focusing on patients hospitalized with AF and reveals rates of off-label  
256 use (8.9% underdosed, 2.3% overdosed) similar to that seen among outpatients.<sup>6,15</sup>  
257 Encouragingly, rates of recommended dosing remain relatively high and are comparable to  
258 prior, smaller analyses in patients with atrial fibrillation warranting long-term anticoagulation.<sup>16</sup>  
259 Consistent with prior, smaller studies, we found that several patient characteristics are more  
260 common in those treated with an off-label dose, including older age, weight, and dialysis  
261 dependence.<sup>6,17</sup> The DOACs studied (apixaban, rivaroxaban and dabigatran) account for the  
262 majority of DOAC use in the United States.<sup>18,19</sup> Broadly, these data provide opportunities to  
263 address this quality gap, focusing on patient profiles at-risk for off-label DOACs dose, risk of  
264 over or underdosing based on type of DOAC utilized. These profiles may prove useful both at

265 the time of hospital discharge as well as during post-hospitalization follow-up clinical  
266 encounters.

267 Significant hospital-level variation of off-label DOACs use exists after accounting for  
268 measured variables. This finding suggests unmeasured aspects of site-level care may account  
269 for a significant proportion of hospital-variation. Such aspects may include variability in  
270 formalized structure surrounding quality improvement such as that recommended for  
271 dedicated AF Centers of Excellence.<sup>20</sup> In this context, system-level quality improvement efforts  
272 may prove fruitful, primarily focusing on reducing rates of underdosing. This may be achieved  
273 with the the development of team-based, integrated clinical care pathways developed by  
274 relevant stakeholders, including pharmacy, nursing, hospital medicine, and cardiology. Key  
275 components may include the establishment of pre-discharge medication review processes,  
276 enhanced clinical decision support with automated dosing checks accounting for key  
277 comorbidities, medications, and up-to-date laboratory values embedded in the electronic  
278 medical record, and close outpatient follow-up attentive to the importance of appropriate  
279 DOAC dosing.

280 Nationwide improvement in rates of recommended DOAC use and decline in the use of  
281 off-label use suggest there may already be some level of recognition of the importance of  
282 appropriately-dosed anticoagulation. Nonetheless, the presence of a significant, persistent gap  
283 and heterogeneity in performance across hospitals underscores the need for continued,  
284 focused mitigation efforts. Endeavors may include not only system-level quality improvement  
285 programs described above but also benchmarking of DOAC dosing and the development of  
286 performance measures. Benchmarking such as that provided by quality improvement registries  
287 like GWTG-AF is likely an effective feedback mechanism to stimulate improvement. In addition,  
288 establishment of provider- and facility-level AF performance measures related to appropriate  
289 AF dosing may also prove to be an effective a feedback mechanism and policy incentive for  
290 continued quality improvement.

291 Limitations of our work include analysis of hospitals participating in the GWTG-AF  
292 Registry, which may select for hospitals choosing to be involved with quality improvement  
293 work. Though missing data was the major contributor to patient exclusion, the primary sample  
294 size of >20,000 patients allow for meaningful analyses and represents a much greater sample in  
295 comparison to other works evaluating off-label dosing. Factors considered by clinicians such as  
296 frailty may influence DOAC dosing and and yet are not captured in the GWTG-AF registry. The  
297 intent of our work was to evaluate rates of and factors associated with recommended and off-  
298 label DOAC dose in those hospitalized for atrial fibrillation, and as such whether off-label DOAC  
299 dosing persisted after discharge was not evaluated. However, this study represents (1) the  
300 largest work, to date, analyzing contemporary DOAC dosing and (2) the first to evaluate  
301 patients hospitalized for AF and discharged on DOAC therapy.

302

## 303 **CONCLUSIONS**

304 One in 10 patients hospitalized for AF are discharged on off-label doses of DOAC, with  
305 significant variation across hospitals. Over time, rates of underdosing and overdosing declined  
306 while the rate of recommended DOAC dosing increased. Owing to persistently elevated rates of  
307 off-label DOAC dosing, quality-improvement efforts should be considered.

308

309 REFERENCES

310

- 311 1. Patel MR, Mahaffey KW, Garg J, Pan G, Singer DE, Hacke W, Breithardt G, Halperin JL,  
312 Hankey GJ, Piccini JP, et al. Rivaroxaban versus warfarin in nonvalvular atrial fibrillation.  
313 *N Engl J Med*. 2011;365:883-891. doi: 10.1056/NEJMoa1009638
- 314 2. Connolly SJ, Ezekowitz MD, Yusuf S, Eikelboom J, Oldgren J, Parekh A, Pogue J, Reilly PA,  
315 Themeles E, Varrone J, et al. Dabigatran versus warfarin in patients with atrial  
316 fibrillation. *N Engl J Med*. 2009;361:1139-1151. doi: 10.1056/NEJMoa0905561
- 317 3. Granger CB, Alexander JH, McMurray JJ, Lopes RD, Hylek EM, Hanna M, Al-Khalidi HR,  
318 Ansell J, Atar D, Avezum A, et al. Apixaban versus warfarin in patients with atrial  
319 fibrillation. *N Engl J Med*. 2011;365:981-992. doi: 10.1056/NEJMoa1107039
- 320 4. Brokmeier H, Kido K. Off-label Use for Direct Oral Anticoagulants: Valvular Atrial  
321 Fibrillation, Heart Failure, Left Ventricular Thrombus, Superficial Vein Thrombosis,  
322 Pulmonary Hypertension-a Systematic Review. *Ann Pharmacother*. 2021;55:995-1009.  
323 doi: 10.1177/1060028020970618
- 324 5. Zhang XL, Zhang XW, Wang TY, Wang HW, Chen Z, Xu B, Xu W. Off-Label Under- and  
325 Overdosing of Direct Oral Anticoagulants in Patients With Atrial Fibrillation: A Meta-  
326 Analysis. *Circ Cardiovasc Qual Outcomes*. 2021;14:e007971. doi:  
327 10.1161/CIRCOUTCOMES.121.007971
- 328 6. Steinberg BA, Shrader P, Thomas L, Ansell J, Fonarow GC, Gersh BJ, Kowey PR, Mahaffey  
329 KW, Naccarelli G, Reiffel J, et al. Off-Label Dosing of Non-Vitamin K Antagonist Oral  
330 Anticoagulants and Adverse Outcomes: The ORBIT-AF II Registry. *J Am Coll Cardiol*.  
331 2016;68:2597-2604. doi: 10.1016/j.jacc.2016.09.966
- 332 7. Sugrue A, Sanborn D, Amin M, Farwati M, Sridhar H, Ahmed A, Mehta R, Siontis KC,  
333 Mulpuru SK, Deshmukh AJ, et al. Inappropriate Dosing of Direct Oral Anticoagulants in  
334 Patients with Atrial Fibrillation. *Am J Cardiol*. 2021;144:52-59. doi:  
335 10.1016/j.amjcard.2020.12.062
- 336 8. Santos J, Antonio N, Rocha M, Fortuna A. Impact of direct oral anticoagulant off-label  
337 doses on clinical outcomes of atrial fibrillation patients: A systematic review. *Br J Clin*  
338 *Pharmacol*. 2020;86:533-547. doi: 10.1111/bcp.14127
- 339 9. Lewis WR, Piccini JP, Turakhia MP, Curtis AB, Fang M, Suter RE, Page RL, 2nd, Fonarow  
340 GC. Get With The Guidelines AFIB: novel quality improvement registry for hospitalized  
341 patients with atrial fibrillation. *Circ Cardiovasc Qual Outcomes*. 2014;7:770-777. doi:  
342 10.1161/CIRCOUTCOMES.114.001263
- 343 10. FDA Package Insert: Dabigatran.  
344 [https://www.accessdata.fda.gov/drugsatfda\\_docs/label/2015/022512s028lbl.pdf](https://www.accessdata.fda.gov/drugsatfda_docs/label/2015/022512s028lbl.pdf).
- 345 11. FDA Package Insert: Rivaroxaban.  
346 [https://www.accessdata.fda.gov/drugsatfda\\_docs/label/2021/215859s000lbl.pdf](https://www.accessdata.fda.gov/drugsatfda_docs/label/2021/215859s000lbl.pdf).
- 347 12. FDA Package Insert: Apixaban.  
348 [https://www.accessdata.fda.gov/drugsatfda\\_docs/label/2012/202155s000lbl.pdf](https://www.accessdata.fda.gov/drugsatfda_docs/label/2012/202155s000lbl.pdf).
- 349 13. Glorioso TJ, Grunwald GK, Ho PM, Maddox TM. Reference effect measures for  
350 quantifying, comparing and visualizing variation from random and fixed effects in non-  
351 normal multilevel models, with applications to site variation in medical procedure use  
352 and outcomes. *BMC Med Res Methodol*. 2018;18:74. doi: 10.1186/s12874-018-0517-7



- 353 14. Chan PS, Maddox TM, Tang F, Spinler S, Spertus JA. Practice-level variation in warfarin  
354 use among outpatients with atrial fibrillation (from the NCDR PINNACLE program). *Am J*  
355 *Cardiol.* 2011;108:1136-1140. doi: 10.1016/j.amjcard.2011.06.017
- 356 15. Dawson T, DeCamillo D, Kong X, Shensky B, Kaatz S, Krol GD, Ali M, Haymart B, Froehlich  
357 JB, Barnes GD. Correcting Inappropriate Prescribing of Direct Oral Anticoagulants: A  
358 Population Health Approach. *J Am Heart Assoc.* 2020;9:e016949. doi:  
359 10.1161/JAHA.120.016949
- 360 16. Luo N, Xu H, Jneid H, Fonarow GC, Lopes RD, Piccini JP, Curtis AB, Russo AM, Lewis WR,  
361 Matsouaka RA, et al. Use of Oral Anticoagulation in Eligible Patients Discharged With  
362 Heart Failure and Atrial Fibrillation. *Circ Heart Fail.* 2018;11:e005356. doi:  
363 10.1161/CIRCHEARTFAILURE.118.005356
- 364 17. Rose AJ, Lee JS, Berlowitz DR, Liu W, Mitra A, Yu H. Guideline-discordant dosing of  
365 direct-acting oral anticoagulants in the veterans health administration. *BMC Health Serv*  
366 *Res.* 2021;21:1351. doi: 10.1186/s12913-021-07397-x
- 367 18. Colacci M, Tseng EK, Sacks CA, Fralick M. Oral Anticoagulant Utilization in the United  
368 States and United Kingdom. *J Gen Intern Med.* 2020;35:2505-2507. doi:  
369 10.1007/s11606-020-05904-0
- 370 19. Marzec LN, Wang J, Shah ND, Chan PS, Ting HH, Gosch KL, Hsu JC, Maddox TM. Influence  
371 of Direct Oral Anticoagulants on Rates of Oral Anticoagulation for Atrial Fibrillation. *J Am*  
372 *Coll Cardiol.* 2017;69:2475-2484. doi: 10.1016/j.jacc.2017.03.540
- 373 20. Piccini JP, Sr., Allred J, Bunch TJ, Deering TF, Di Biase L, Hussein AA, Lewis WR, Mittal S,  
374 Natale A, Osorio J, et al. Rationale, considerations, and goals for atrial fibrillation centers  
375 of excellence: A Heart Rhythm Society perspective. *Heart Rhythm.* 2020;17:1804-1832.  
376 doi: 10.1016/j.hrthm.2020.04.033

377  
378  
379  
380  
381  
382  
383  
384  
385  
386  
387  
388  
389  
390  
391  
392  
393  
394  
395  
396

397 **TABLES AND FIGURES**

398

399 **Tables**

400 Table 1: Summary of DOAC information, patient-level and hospital characteristics stratified by  
401 underdosed, recommended dose, overdosed and the overall cohort.

402

403 Table 2. Contribution to Hospital-Level Variation by Groups of Factors: All Factors, Patient-Level  
404 Factors, and Hospital-Level Factors

405

406

407 **Figures**

408 Figure 1: Rates of DOAC dosing at discharge in those hospitalized for atrial fibrillation, stratified  
409 by recommended dosing, underdosed or overdosed (percentages displayed).

410

411 Figure 2: Factors associated with off-label dosing (Panel A: Underdosing and Panel B:  
412 Overdosing).

413

414 Figure 3: Facility-level variation in the rate of off-label DOAC use (Panel A), overdosing (Panel B)  
415 and underdosing (panel C) at discharge

416

417 Figure 4: Trends, from 2014-2020, in the rates of recommended, under and overdosing of  
418 DOACs.

419

420

421 **Appendix**

422 Supplemental Table 1: Baseline dosing recommendation and dosing adjustments for commonly  
423 prescribed DOACs in the United States.

424

425 Supplemental Figure 1: Attrition plot deriving the primary cohort of interest.

426

427

428

429

430

431

432

433

434

435

436

437

438

439

440

441 **Table 1:** Summary of DOAC information, patient-level and hospital characteristics stratified by  
 442 underdosed, recommended dose, overdosed and the overall cohort.

| Variable                                 | Overall<br>(N=22470) | Underdosed<br>(N=2006) | Recommended<br>(N=19953) | Overdosed<br>(N=511) | P-value+ |
|------------------------------------------|----------------------|------------------------|--------------------------|----------------------|----------|
| <b>Demographics</b>                      |                      |                        |                          |                      |          |
| Age, Mean (years) +/- STD                | 70.1 +/- 12.1        | 76.9 +/- 11.2          | 69.1 +/- 11.9            | 80.6 +/- 7.8         | <.0001   |
| Sex, Female (%)                          | 10818 (48.1%)        | 1184 (59.0%)           | 9295 (46.6%)             | 339 (66.3%)          | <.0001   |
| BMI, Mean +/- STD                        | 31.2 +/- 7.9         | 29.7 +/- 7.0           | 31.5 +/- 7.9             | 25.1 +/- 5.8         | <.0001   |
| <b>Race/Ethnicity</b>                    |                      |                        |                          |                      |          |
| White, N (%)                             | 18530 (82.5%)        | 1591 (79.3%)           | 16516 (82.8%)            | 423 (82.8%)          | <.0001   |
| Black, N (%)                             | 1398 (6.2%)          | 106 (5.3%)             | 1268 (6.4%)              | 24 (4.7%)            |          |
| Asian, N (%)                             | 286 (1.3%)           | 35 (1.7%)              | 246 (1.2%)               | 5 (0.9%)             |          |
| Other, N (%)                             | 739 (3.3%)           | 73 (3.6%)              | 650 (3.3%)               | 16 (3.1%)            |          |
| <b>Insurance</b>                         |                      |                        |                          |                      |          |
| Missing, N (%)                           | 216 (1.0%)           | 11 (0.6%)              | 201 (1.0%)               | 4 (0.8%)             | <.0001   |
| Private/HMO/Other, N (%)                 | 9397 (41.8%)         | 668 (33.3%)            | 8584 (43.0%)             | 145 (28.4%)          |          |
| Medicaid, N (%)                          | 2219 (9.9%)          | 198 (9.9%)             | 1974 (9.9%)              | 47 (9.2%)            |          |
| Medicare, N(%)                           | 5260 (23.4%)         | 557 (27.8%)            | 4556 (22.8%)             | 147 (28.8%)          |          |
| Medicare - Private/HMO/Other, N (%)      | 4894 (21.8%)         | 544 (27.1%)            | 4184 (21.0%)             | 166 (32.5%)          |          |
| No Insurance, N (%)                      | 484 (2.2%)           | 28 (1.4%)              | 454 (2.3%)               | 2 (0.4%)             |          |
| <b>Comorbid Conditions</b>               |                      |                        |                          |                      |          |
| Anemia, N (%)                            | 2095 (9.3%)          | 283 (14.1%)            | 1747 (8.8%)              | 65 (12.7%)           | <.0001   |
| COPD, N (%)                              | 3698 (16.5%)         | 406 (20.2%)            | 3175 (15.9%)             | 117 (22.9%)          | <.0001   |
| Coronary Artery Disease, N (%)           | 6319 (28.1%)         | 703 (35.0%)            | 5440 (27.3%)             | 176 (34.4%)          | <.0001   |
| CRT-D, N (%)                             | 307 (1.4%)           | 30 (1.5%)              | 267 (1.3%)               | 10 (2.0%)            | 0.4298   |
| CRT-P, N(%)                              | 57 (0.3%)            | 4 (0.2%)               | 49 (0.3%)                | 4 (0.8%)             | 0.0513   |
| Prior Stroke or TIA, N (%)               | 2795 (12.4%)         | 320 (16.0%)            | 2399 (12.0%)             | 76 (14.9%)           | <.0001   |
| Diabetes, N (%)                          | 6524 (29.0%)         | 647 (32.3%)            | 5750 (28.8%)             | 127 (24.9%)          | 0.0006   |
| Dialysis, N (%)                          | 158 (0.7%)           | 54 (2.7%)              | 92 (0.5%)                | 12 (2.4%)            | <.0001   |
| Heart Failure, N (%)                     | 6570 (29.2%)         | 670 (33.4%)            | 5724 (28.7%)             | 176 (34.4%)          | <.0001   |
| Hypertension, N (%)                      | 17744 (79.0%)        | 1663 (83.0%)           | 15666 (78.5%)            | 415 (81.2%)          | <.0001   |
| ICD Only, N (%)                          | 723 (3.2%)           | 71 (3.5%)              | 639 (3.2%)               | 13 (2.5%)            | 0.4902   |
| Left Ventricular Hypertrophy, N (%)      | 312 (1.4%)           | 23 (1.2%)              | 280 (1.4%)               | 9 (1.8%)             | 0.4946   |
| Liver Disease, N (%)                     | 220 (1.0%)           | 22 (1.1%)              | 193 (1.0%)               | 5 (1.0%)             | 0.8543   |
| Mechanical Prosthetic Heart Valve, N (%) | 82 (0.4%)            | 12 (0.6%)              | 68 (0.3%)                | 2 (0.4%)             | 0.1891   |
| Mitral Stenosis, N (%)                   | 103 (0.5%)           | 5 (0.3%)               | 95 (0.5%)                | 3 (0.6%)             | 0.3253   |
| Obstructive Sleep Apnea, N (%)           | 4523 (20.1%)         | 265 (13.2%)            | 4200 (21.1%)             | 58 (11.4%)           | <.0001   |
| Pacemaker, N (%)                         | 1597 (7.1%)          | 194 (9.7%)             | 1338 (6.7%)              | 65 (12.7%)           | <.0001   |
| Peripheral Vascular Disease, N (%)       | 1327 (5.9%)          | 163 (8.1%)             | 1108 (5.6%)              | 56 (11.0%)           | <.0001   |
| Prior Hemorrhage, N (%)                  | 627 (2.8%)           | 94 (4.7%)              | 518 (2.6%)               | 15 (2.9%)            | <.0001   |
| Prior MI, N (%)                          | 2236 (10.0%)         | 243 (12.1%)            | 1945 (9.8%)              | 48 (9.4%)            | 0.0031   |
| Prior PCI, N (%)                         | 2793 (12.4%)         | 320 (16.0%)            | 2394 (12.0%)             | 79 (15.5%)           | <.0001   |
| Rheumatic Heart Disease, N (%)           | 43 (0.2%)            | 7 (0.4%)               | 36 (0.2%)                | 0 (0%)               | 0.1562   |
| Sinus Node Dysfunction, N (%)            | 939 (4.2%)           | 114 (5.7%)             | 786 (3.9%)               | 39 (7.6%)            | <.0001   |
| Smoker, N (%)                            | 2257 (10.0%)         | 159 (7.9%)             | 2065 (10.4%)             | 33 (6.5%)            | <.0001   |
| Thyroid Disease, N (%)                   | 4206 (18.3%)         | 487 (24.3%)            | 3595 (18.0%)             | 124 (24.3%)          | <.0001   |

443  
 444  
 445  
 446

447 **Table 1 (Continued)**

|                                                                                |                |                 |                 |                 |         |
|--------------------------------------------------------------------------------|----------------|-----------------|-----------------|-----------------|---------|
| <b>Atrial Fibrillation Type</b>                                                |                |                 |                 |                 |         |
| First Detected Atrial Fibrillation, N (%)                                      | 4664 (20.8%)   | 465 (23.2%)     | 4102 (20.6%)    | 97 (19.0%)      | <0.0001 |
| Paroxysmal Atrial Fibrillation, N (%)                                          | 9445 (42.0%)   | 832 (41.2%)     | 8388(42.0%)     | 225 (44.0%)     |         |
| Persistent Atrial Fibrillation, N (%)                                          | 5011 (22.3%)   | 290 (14.5%)     | 4629 (23.2%)    | 92 (18.0%)      |         |
| Permanent or long standing Persistent Atrial Fibrillation, N (%)               | 1217 (5.4%)    | 147 (7.3%)      | 1026 (5.1%)     | 44 (8.6%)       |         |
| Unable to Determine, N (%)                                                     | 2132 (9.5%)    | 272 (13.6%)     | 1807 (9.1%)     | 53 (10.4%)      |         |
| <b>Cardiomyopathy Type</b>                                                     |                |                 |                 |                 |         |
| Ischemic, N (%)                                                                | 785 (3.5%)     | 88 (4.4%)       | 677 (3.4%)      | 20 (3.9%)       | <.0001  |
| Non-Ischemic, N (%)                                                            | 1458 (6.5%)    | 71 (3.52%)      | 1364 (6.8%)     | 23 (4.5%)       |         |
| Both, N (%)                                                                    | 23 (0.1%)      | 0 (0%)          | 22 (0.1%)       | 1 (0.2%)        |         |
| Missing, N (%)                                                                 | 793 (3.5%)     | 55 (2.7%)       | 721 (3.6%)      | 17 (3.3%)       |         |
| <b>Other Risk Factors</b>                                                      |                |                 |                 |                 |         |
| CHADS2Vasc Score, Mean +/- STD                                                 | 3.76 +/- 1.75  | 4.59 +/- 1.6    | 3.65 +/- 1.74   | 4.81 +/- 1.41   | <.0001  |
| ORBIT Score, Mean +/- STD                                                      | 1.93 +/- 1.53  | 2.74 +/- 1.47   | 1.82 +/- 1.5    | 2.90 +/- 1.39   | <.0001  |
| CKD with eGFR < 60 ml/min, N (%)                                               | 8456 (37.6%)   | 1149 (57.3%)    | 6950 (34.8%)    | 357 (69.9%)     | <.0001  |
| Prior Major Bleeding, N (%)                                                    | 2146 (9.6%)    | 304 (15.2%)     | 1781 (8.9%)     | 61 (11.9%)      | <.0001  |
| Prior AF Ablation Procedure, N (%)                                             | 2797 (12.5%)   | 155 (7.7%)      | 2590 (13.0%)    | 52 (10.2%)      | <.0001  |
| <b>Admission Creatinine Clearance (Cockcroft Gault, Mean (ml/min) +/- STD)</b> | 86.39 +/- 46   | 61.69 +/- 35.45 | 90.01 +/- 46.12 | 42.82 +/- 16.33 | <.0001  |
| <b>Discharge Creatinine Clearance (Cockcroft Gault, Mean (ml/min) +/- STD)</b> | 90.6 +/- 47.43 | 65.7 +/- 35.13  | 94.38 +/- 47.6  | 40.88 +/- 12.18 | <.0001  |
| <b>Anti-arrhythmic Medication Use Prior to Admission, N (%)</b>                | 4445 (19.8%)   | 355 (17.7%)     | 3990 (20.0%)    | 100 (19.6%)     | 0.0473  |
| <b>Hospital Characteristics</b>                                                |                |                 |                 |                 |         |
| Academic / Teaching Hospital, N (%)                                            | 18355 (81.7%)  | 1541 (76.8%)    | 16406 (82.2%)   | 408 (79.8%)     | <.0001  |
| Teaching Status Missing, N (%)                                                 | 984 (4.4%)     | 109 (5.4%)      | 841 (4.2%)      | 34 (6.7%)       |         |
| Rural Location, N (%)                                                          | 1073 (4.8%)    | 88 (4.4%)       | 952 (4.8%)      | 33 (6.5%)       | 0.1204  |
| Location Missing, N (%)                                                        | 985 (4.4%)     | 109 (5.4%)      | 841 (4.2%)      | 34 (6.7%)       |         |
| Adult Cardiac Electrophysiology Hospital, N (%)                                | 2044 (9.1%)    | 229 (11.4%)     | 1746 (8.8%)     | 69 (13.5%)      | <.0001  |
| Missing, N (%)                                                                 | 3031 (13.5%)   | 379 (18.9%)     | 2541 (12.7%)    | 111 (21.7%)     |         |
| Bed Size, Missing, N (%)                                                       | 984 (4.4%)     | 109 (5.4%)      | 841 (4.2%)      | 34 (6.7%)       | <.0001  |
| 25-49 Hospital Beds, N (%)                                                     | 24 (0.1%)      | 2 (0.1%)        | 20 (0.1%)       | 2 (0.4%)        |         |
| 50-99 Hospital Beds, N (%)                                                     | 500 (2.2%)     | 39 (1.9%)       | 445 (2.2%)      | 16 (3.1%)       |         |
| 100-199 Hospital Beds , N (%)                                                  | 2289 (10.2%)   | 318 (15.9%)     | 1901 (9.5%)     | 70 (13.7%)      |         |
| 200-299 Hospital Beds, N (%)                                                   | 1969 (8.8%)    | 218 (10.9%)     | 1691 (8.5%)     | 60 (11.7%)      |         |
| 300-399 Hospital Beds, N (%)                                                   | 3143 (14.0%)   | 261 (13.0%)     | 2810 (14.1%)    | 72 (14.1%)      |         |
| 400-499 Hospital Beds, N (%)                                                   | 4064 (18.1%)   | 381 (19.0%)     | 3601 (18.1%)    | 82 (16.1%)      |         |
| 500+ Hospital Beds, N (%)                                                      | 9497 (42.3%)   | 678 (33.8%)     | 8644 (43.3%)    | 175 (34.3%)     |         |
| Hospital Location, Missing, N (%)                                              | 30 (0.1%)      | 4 (0.2%)        | 26 (0.1%)       | 0 (0%)          | <.0001  |
| Northeast, N (%)                                                               | 6529 (29.1%)   | 423 (21.1%)     | 5974 (29.9%)    | 132 (25.8%)     |         |
| Midwest, N (%)                                                                 | 3478 (15.5%)   | 225 (11.2%)     | 3197 (16.0%)    | 56 (11.0%)      |         |
| South, N (%)                                                                   | 9402 (41.8%)   | 997 (49.7%)     | 8156 (40.9%)    | 249 (48.7%)     |         |
| West, N (%)                                                                    | 3031 (13.5%)   | 357 (17.8%)     | 2600 (13.0%)    | 74 (14.5%)      |         |

448  
449 STD = standard deviation; COPD = chronic obstructive pulmonary disease; CRT-P = cardiac  
450 resynchronization therapy – pacemaker; CRT-D = cardiac resynchronization therapy –  
451 defibrillator; PCI = percutaneous coronary intervention; MI = myocardial infarction; ICD =  
452 implantable-cardioverter defibrillator; AF = atrial fibrillation; HMO = health maintenance  
453 organization

454 **Table 2:** Contribution to Hospital-Level Variation by Groups of Factors: All Factors, Patient-Level  
 455 Factors, and Hospital-Level Factors  
 456

|                |                  | <b>Reference Effect Measures* ranges and percentiles</b> |                        |                        |
|----------------|------------------|----------------------------------------------------------|------------------------|------------------------|
| <b>Outcome</b> | <b>Variables</b> | <b>Range</b>                                             | <b>10<sup>th</sup></b> | <b>90<sup>th</sup></b> |
| Underdosed     | All factors      | [0.147, 5.496]                                           | 0.289                  | 3.224                  |
|                | Patient factors  | [0.172, 4.325]                                           | 0.328                  | 2.826                  |
|                | Hospital factors | [0.669, 2.159]                                           | 0.77                   | 1.698                  |
| Overdosed      | All factors      | [0.017, 13.797]                                          | 0.082                  | 6.606                  |
|                | Patient factors  | [0.017, 12.794]                                          | 0.085                  | 6.34                   |
|                | Hospital factors | [0.630, 1.187]                                           | 0.63                   | 1.187                  |

\*Compares patients clustered within hospitals at specified percentiles of random effect distributions to similar patients in a reference, median hospital. Wider ranges indicate larger contributions to overall variation in outcome from variables.

457  
 458  
 459

460 **Figure 1:** Rates of DOAC dosing at discharge in those hospitalized for atrial fibrillation, stratified  
461 by recommended dosing, underdosed or overdosed (percentages displayed).

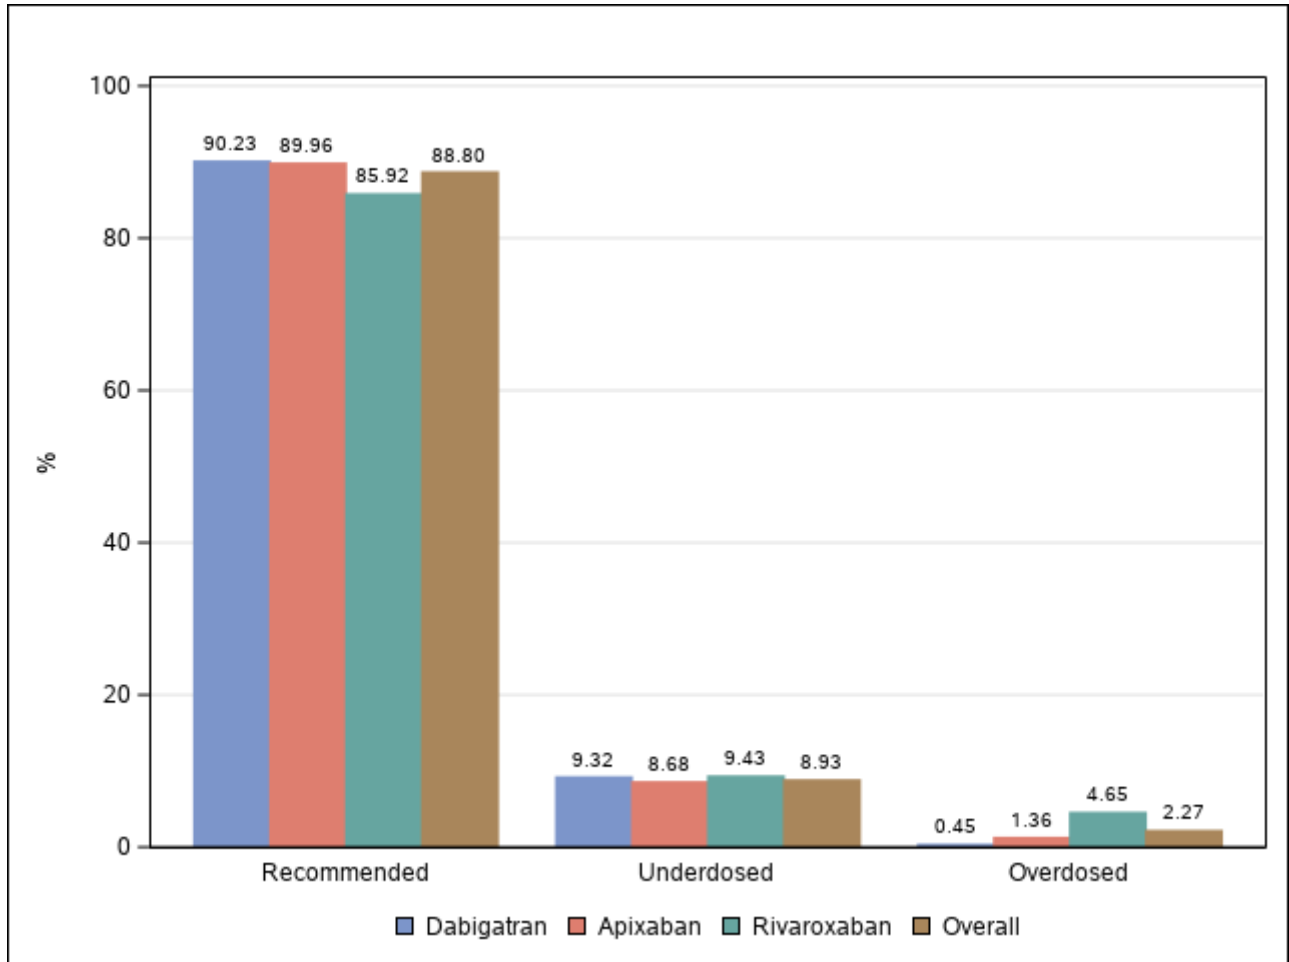

462  
463  
464  
465  
466  
467  
468  
469  
470  
471  
472  
473  
474  
475  
476  
477

478 **Figure 2:** Factors associated with off-label dosing.

479 **Panel A.** Factors associated with DOAC underdosing versus recommended dosing.

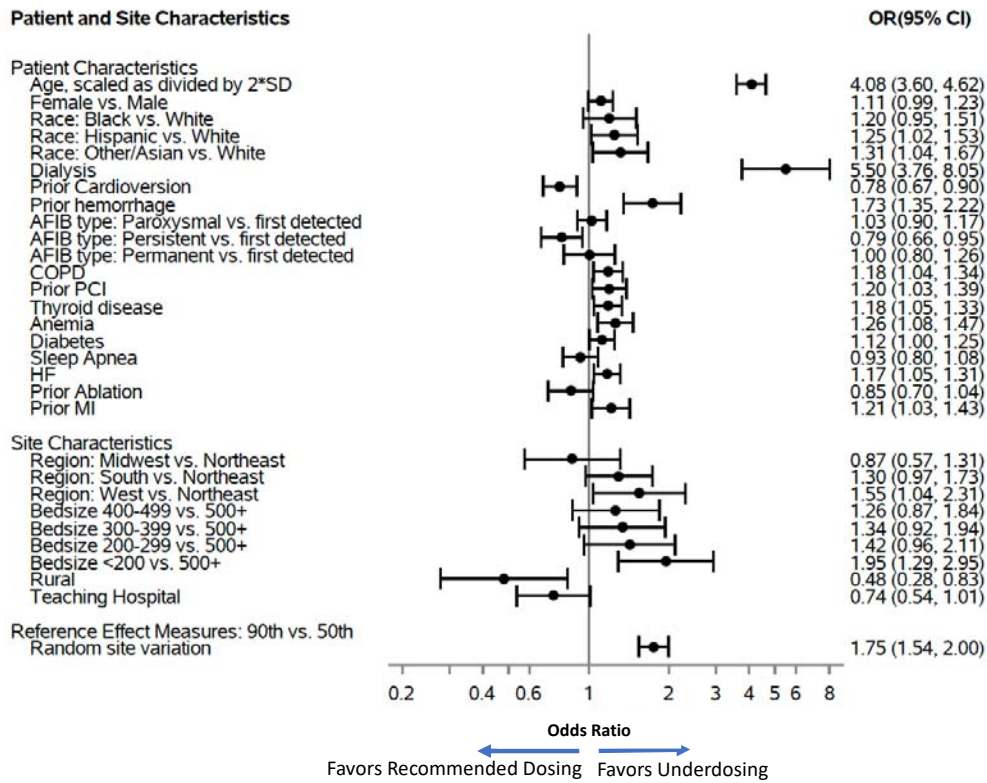

480

481 **Panel B.** Factors associated with DOAC overdosing versus recommended dosing.

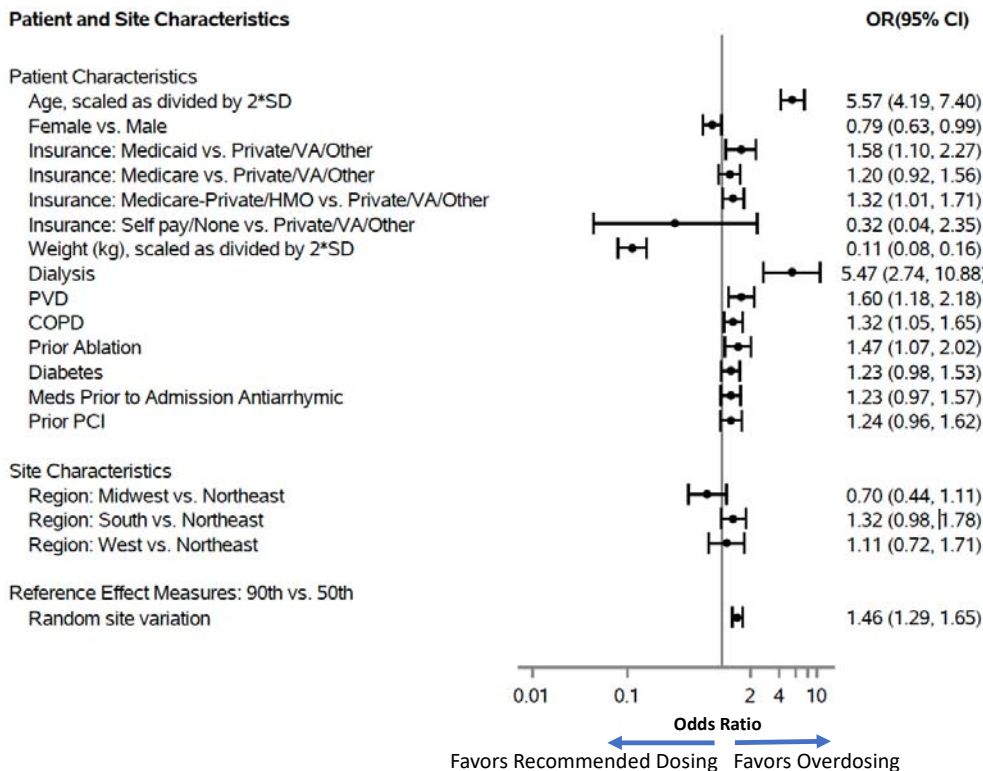

482

483 **Figure 3:** Hospital-level variation in the rate of off-label DOAC use (panel A), overdosing (panel  
484 B) and underdosing (panel C) at discharge.

485  
486  
487  
488  
489  
490  
491  
492  
493  
494  
495  
496  
497  
498  
499  
500  
501  
502  
503  
504  
505  
506

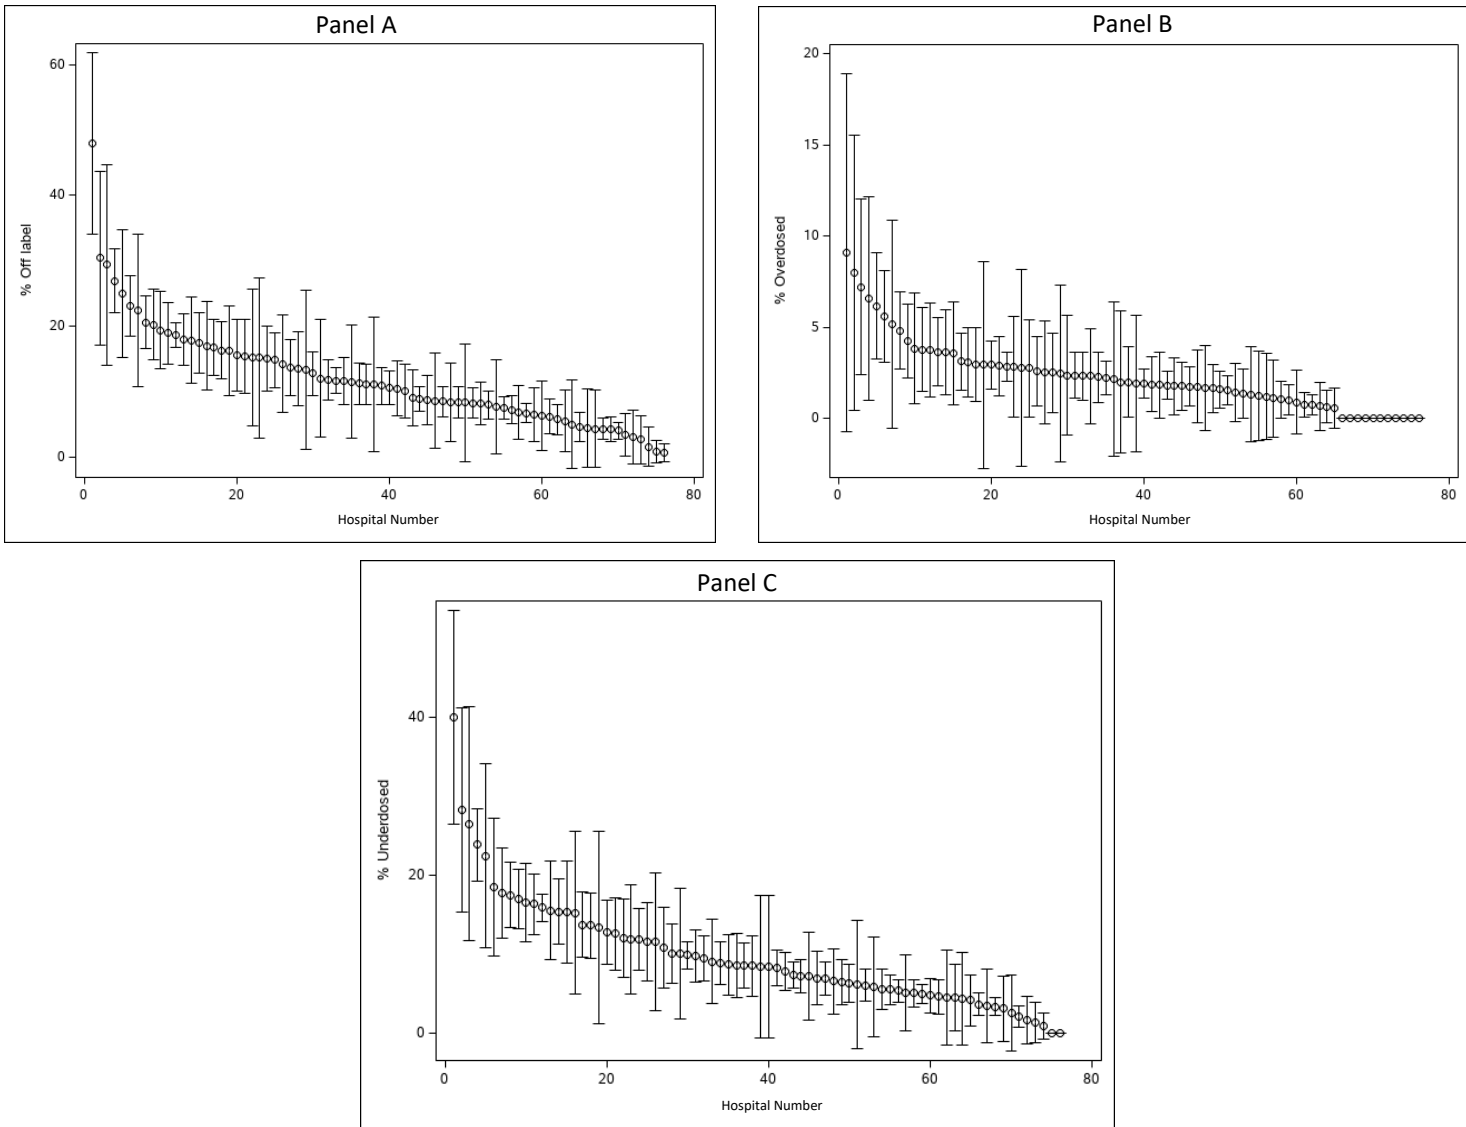



507 **Figure 4:** Trends, from 2014-2020, in the rates of recommended dosing, underdosing, and  
508 overdosing of DOACs.  
509

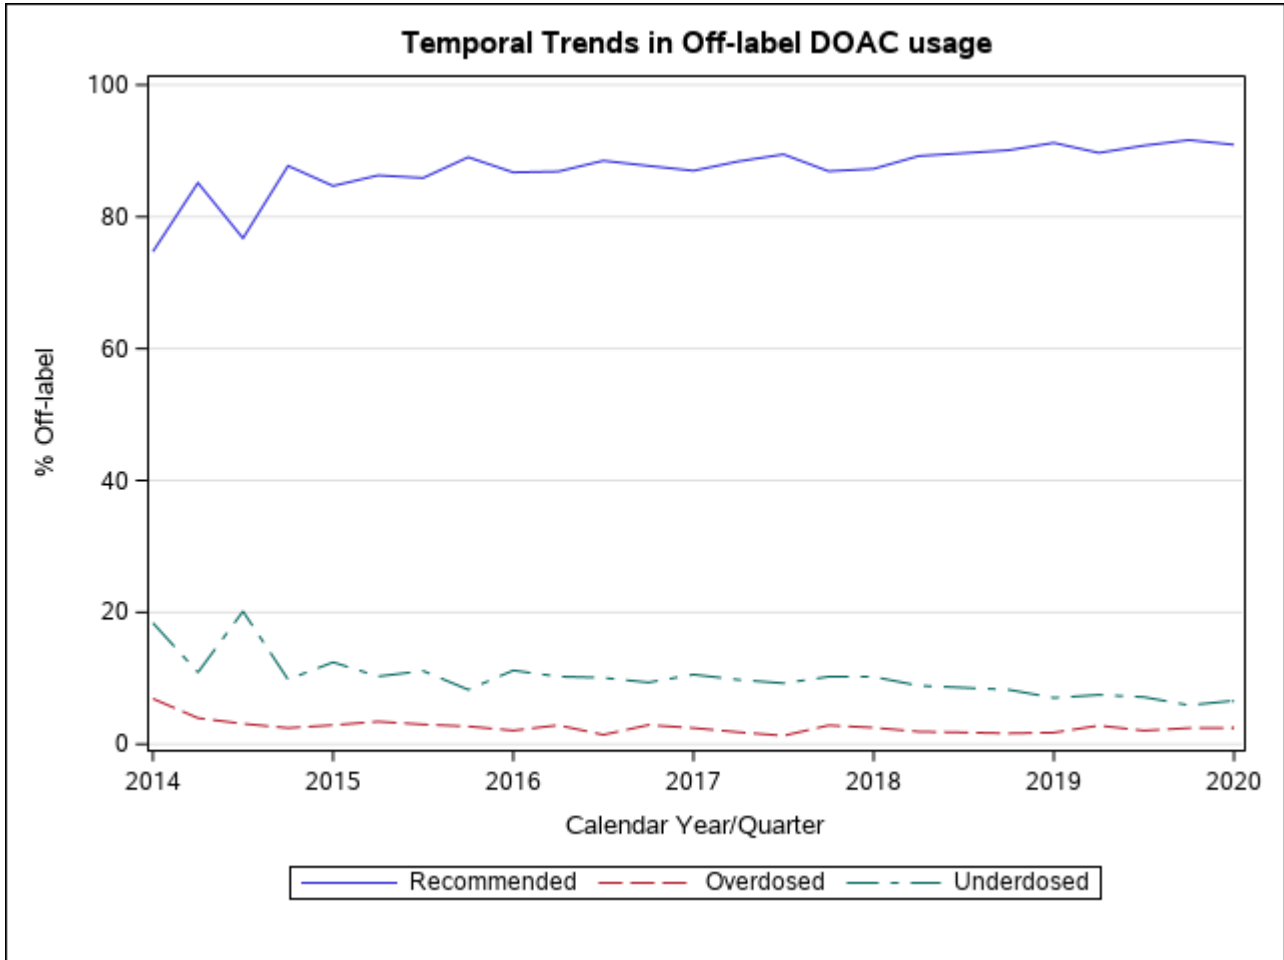

510  
511  
512  
513  
514  
515  
516  
517  
518  
519  
520  
521  
522  
523  
524  
525

526  
527  
528  
529

**Appendix**

Supplemental Figure 1: Baseline dosing recommendation and dosing adjustments for commonly prescribed DOACs in the United States.

|                    | <b>Baseline Dosing Recommendation</b> | <b>Dosing Adjustments</b>                                                                                                                                                                                                                                                                                                                         |
|--------------------|---------------------------------------|---------------------------------------------------------------------------------------------------------------------------------------------------------------------------------------------------------------------------------------------------------------------------------------------------------------------------------------------------|
| <b>Dabigatran</b>  | 150mg PO BID for CrCl >30 ml/min      | <ol style="list-style-type: none"><li>1. CrCl 30-50 ml/min = if receiving concomitant dronedarone, reduce to 75mg PO BID</li><li>2. 15-30 ml/min = 75mg PO BID unless on dronedarone, then avoid concurrent use</li><li>3. CrCl &lt;15 ml/min = Not Recommended</li></ol>                                                                         |
| <b>Apixaban</b>    | 5mg PO BID                            | <ol style="list-style-type: none"><li>1. 2.5mg PO BID recommended if any 2 of 3 factors present: age <math>\geq</math>80 years old, weight <math>\leq</math>60 kg or Creatinine <math>\geq</math>1.5 mg/dL</li><li>2. If on dialysis: 5mg PO BID, reduce to 2.5mg BID if age <math>\geq</math>80 years or weight <math>\leq</math>60 Kg</li></ol> |
| <b>Rivaroxaban</b> | 20mg PO qDay for CrCl >50 ml/min      | <ol style="list-style-type: none"><li>1. CrCl 15-50 ml/min = 15mg PO qDay</li><li>2. CrCl &lt;15 ml/min = Not Recommended</li></ol>                                                                                                                                                                                                               |

530  
531  
532  
533  
534  
535  
536  
537  
538  
539  
540  
541  
542  
543  
544  
545  
546  
547  
548  
549  
550  
551

552 Supplemental Figure 1: Attrition plot deriving the primary cohort of interest.

553

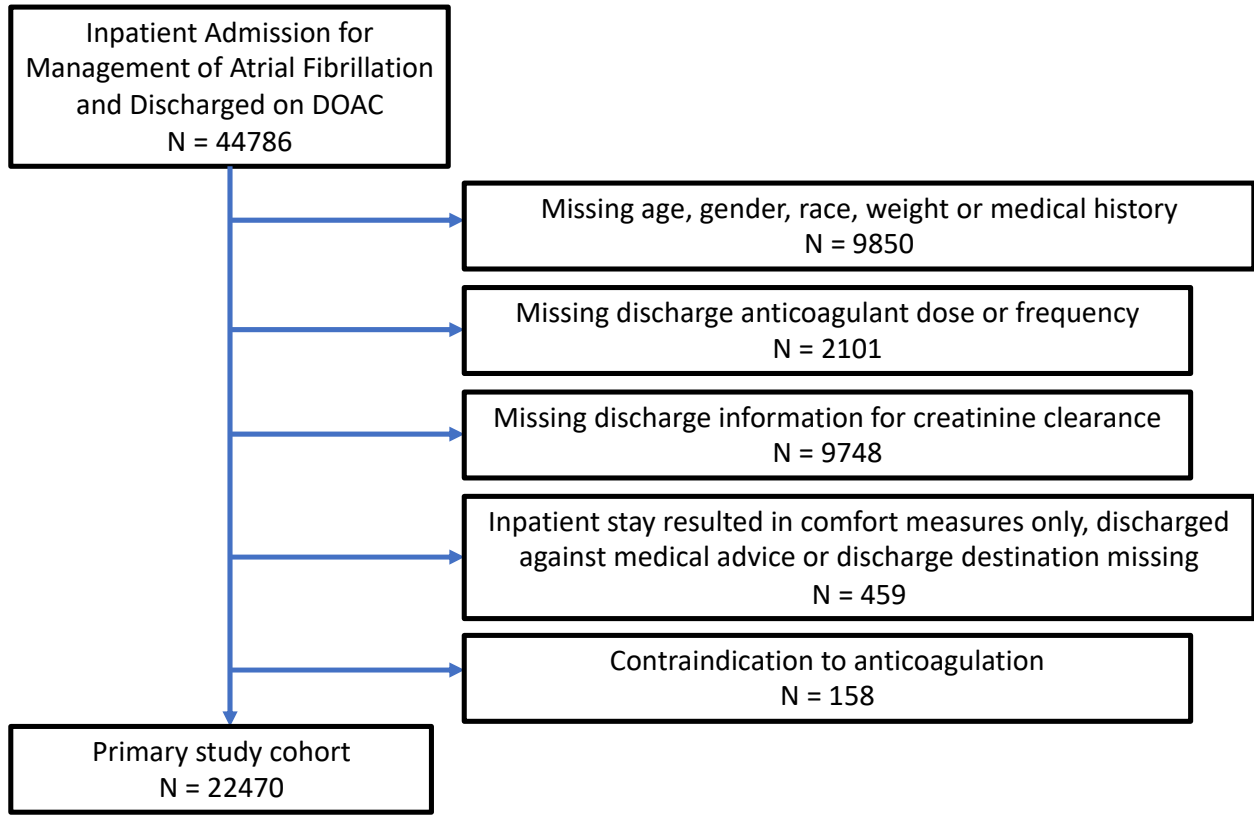

554
